# Supplementary material for: Computational Simulation of Adapter Length-Dependent LASSO Probe Capture Efficiency
Source: MDPI journal article supplement (doi:10.3390/biom9050199), 2019-05-22
Supplement: s1 [file s1]

**Table 1.** Sequences of primers.

0.4 um primers

| Step             | Name                    | Sequence                             |
|------------------|-------------------------|--------------------------------------|
| Fusion<br>PCR    | Blaf (Forward)          | GAGTATTACCGCGGCGAATTC                |
|                  | RFP200 (Rev for 200 LA  | AAGCTGGAATTCGCTTCCGTACTGGAAGTGAAGGGC |
|                  | RFP400 (Rev for 400 LA) | AAGCTGGAATTCATGACAGGGCCATCGGAGGGG    |
|                  | RFP800 (Rev for 800 LA) | AAGCTGGAATTCGAGGCGCACCGTGGGCTTG      |
| Inversion<br>PCR | TioINew                 | A*T*C*GCCGCAAGAAGTGTU                |
|                  | /5Phos/SapINew          | GGTTCCTGGCTCTTCGATC                  |
|                  | Lig_M13                 | GCGAACCAGACCGGAAGCA                  |
|                  | Ext_M13_0.6_5Phos       | GATTGGGTAATGAATATCCGGTTCTTG          |
|                  | Ext_M13_1.0_5Phos       | GCCGTTGCTACCCTCGTTCCGATGC            |
|                  | Ext_M13_2.0_5Phos       | GGCTCTGAGGGTGGCGGTTCTGAGG            |
| Capture<br>PCR   | Ext_M13_4.0_5Phos       | GGCGAATCCGTTATTGTTCTCCCGATGTA        |
|                  | PCR1kbCaptR200          | CGCTTCCCTCCATCTTGACCTTAAATCTCA       |
|                  | ICeuI200CaptF           | CTCCCCTTCTCCTGGGATATTCTG             |
|                  | PCR1kbCaptF400          | GTGAAACTCAGAGGAACCAACTTCC            |

Both 400 & 800 nt long adaptors were amplified with PCR1kbCaptF400 primers. The "\*" asterisks denote phosphorothioate bonds which protect the DNA strand from exonuclease activity.
